# Supplementary material
Source: HighWire-hosted journal article supplement (https://jnm.snmjournals.org/highwire/filestream/109083/field_highwire_adjunct_files/0/263884_Supplemental_Data.pdf)
Supplement: 263884_Supplemental_Data.pdf [file 263884_Supplemental_Data.pdf]

# SUPPLEMENTAL TABLE 1

Quality Control Data from Three Representative Batches of  $^{68}\text{Ga}$ -Citrate

| Product specifications      | Limits for product release                      | Results               |
|-----------------------------|-------------------------------------------------|-----------------------|
| Appearance                  | Clear and colorless solution, free of particles | Pass                  |
| pH                          | 3.0–7.0                                         | $4.7 \pm 0.3$         |
| Radionuclidic identity      | 68 min $\pm$ 3 min                              | $68.1 \pm 0.2$ min    |
| Radiochemical purity        | $\geq 95\%$ by iTLC*                            | $97.3\% \pm 0.6$      |
| Radioactivity concentration | $\geq 15$ MBq/mL                                | $44.3 \pm 1.2$ MBq/mL |
| Radionuclidic purity        | $\geq 99.9\%$ $^{68}\text{Ga}$                  | Pass                  |
|                             | $\leq 0.001\%$ $^{68}\text{Ge}$                 | Pass                  |
| Content of ethanol          | $\leq 5$ mg/mL                                  | $1.3\% \pm 1.1$       |
| Residual solvents (acetone) | $\leq 5$ mg/mL                                  | $0.0\% \pm 0.0$       |
| Sterile filter integrity    | $\geq 3.45$ bar                                 | $4.1 \pm 0.1$ bar     |
| Sterility                   | Sterile (no viable organisms detected)          | Pass                  |
| Bacterial endotoxins        | $\leq 17.5$ EU $\dagger$ /mL                    | $1.2 \pm 0.0$ EU/mL   |

\*iTLC = instant thin-layer chromatography.  $\dagger$ EU = endotoxin units.

## SUPPLEMENTAL TABLE 2

Decay-Corrected Radioactivity Concentration (SUV) of  $^{68}\text{Ga}$ -Citrate as a Function of Time in Organs of Healthy Men

### Brain

| Time<br>(h)                     | Time<br>(min) | Subject<br>#1 | Subject<br>#2 | Subject<br>#3 | Subject<br>#4 | Subject<br>#5 | Subject<br>#6 | Mean | SD   | Min  | Max  | COV  |
|---------------------------------|---------------|---------------|---------------|---------------|---------------|---------------|---------------|------|------|------|------|------|
| 0:01:00                         | 1.0           | 0.43          | 0.37          | 0.38          | 0.43          | 0.40          | 0.49          | 0.42 | 0.04 | 0.37 | 0.49 | 11 % |
| 0:05:00                         | 5.0           | 0.34          | 0.37          | 0.32          | 0.43          | 0.43          | 0.46          | 0.39 | 0.06 | 0.32 | 0.46 | 14 % |
| 0:10:00                         | 10.0          | 0.30          | 0.32          | 0.29          | 0.36          | 0.35          | 0.42          | 0.34 | 0.05 | 0.29 | 0.42 | 15 % |
| 0:20:00                         | 20.0          | 0.26          | 0.27          | 0.25          | 0.29          | 0.30          | 0.37          | 0.29 | 0.05 | 0.25 | 0.37 | 16 % |
| 0:30:00                         | 30.0          | 0.23          | 0.24          | 0.23          | 0.27          | 0.27          | 0.34          | 0.26 | 0.04 | 0.23 | 0.34 | 17 % |
| 1:30:00                         | 90.0          | 0.19          | 0.17          | 0.21          | 0.25          | 0.22          | 0.26          | 0.22 | 0.04 | 0.17 | 0.26 | 17 % |
| 3:00:00                         | 180.0         | 0.16          | 0.14          | 0.15          | 0.20          | 0.18          | 0.23          | 0.18 | 0.03 | 0.14 | 0.23 | 19 % |
| Organ volume (cm <sup>3</sup> ) |               | 1505          | 1355          | 1435          | 1545          | 1662          | 1402          | 1484 | 111  | 1355 | 1662 | 7 %  |

### Gall bladder contents

| Time<br>(h)                     | Time<br>(min) | Subject<br>#1 | Subject<br>#2 | Subject<br>#3 | Subject<br>#4 | Subject<br>#5 | Subject<br>#6 | Mean | SD   | Min  | Max  | COV  |
|---------------------------------|---------------|---------------|---------------|---------------|---------------|---------------|---------------|------|------|------|------|------|
| 0:01:00                         | 1.0           | 1.37          | 0.63          | 1.59          | 0.25          | 0.40          | 0.55          | 0.80 | 0.55 | 0.25 | 1.59 | 69 % |
| 0:05:00                         | 5.0           | 1.61          | 0.55          | 2.05          | 0.38          | 0.74          | 0.51          | 0.97 | 0.69 | 0.38 | 2.05 | 71 % |
| 0:10:00                         | 10.0          | 1.41          | 0.46          | 1.71          | 0.52          | 0.89          | 0.66          | 0.94 | 0.51 | 0.46 | 1.71 | 54 % |
| 0:20:00                         | 20.0          | 1.23          | 0.41          | 2.01          | 0.75          | 0.88          | 0.67          | 0.99 | 0.57 | 0.41 | 2.01 | 57 % |
| 0:30:00                         | 30.0          | 0.90          | 0.51          | 1.79          | 0.63          | 1.06          | 0.66          | 0.93 | 0.47 | 0.51 | 1.79 | 51 % |
| 1:30:00                         | 90.0          | 1.98          | 0.77          | 1.30          | 1.11          | 0.97          | 0.73          | 1.14 | 0.46 | 0.73 | 1.98 | 40 % |
| 3:00:00                         | 180.0         | 2.16          | 1.06          | 1.16          | 1.59          | 1.11          | 0.69          | 1.29 | 0.51 | 0.69 | 2.16 | 40 % |
| Organ volume (cm <sup>3</sup> ) |               | 15            | 22            | 9             | 9             | 15            | 28            | 16   | 7    | 9    | 28   | 46 % |

### Lower Large Intestine (left colon & rectum)

| Time<br>(h) | Time<br>(min) | Subject<br>#1 | Subject<br>#2 | Subject<br>#3 | Subject<br>#4 | Subject<br>#5 | Subject<br>#6 | Mean | SD   | Min  | Max  | COV  |
|-------------|---------------|---------------|---------------|---------------|---------------|---------------|---------------|------|------|------|------|------|
| 0:01:00     | 1.0           | 0.62          | 0.51          | 0.57          | 1.03          | 0.74          | 0.91          | 0.73 | 0.21 | 0.51 | 1.03 | 28 % |
| 0:05:00     | 5.0           | 0.68          | 0.56          | 0.52          | 1.12          | 1.13          | 0.93          | 0.82 | 0.27 | 0.52 | 1.13 | 33 % |
| 0:10:00     | 10.0          | 0.75          | 0.72          | 0.67          | 1.15          | 1.30          | 0.98          | 0.93 | 0.26 | 0.67 | 1.30 | 28 % |

|         |       |      |      |      |      |      |      |      |      |      |      |      |
|---------|-------|------|------|------|------|------|------|------|------|------|------|------|
| 0:20:00 | 20.0  | 0.85 | 0.75 | 0.86 | 1.36 | 1.37 | 1.16 | 1.06 | 0.27 | 0.75 | 1.37 | 26 % |
| 0:30:00 | 30.0  | 0.93 | 0.81 | 0.82 | 1.52 | 1.45 | 1.41 | 1.16 | 0.34 | 0.81 | 1.52 | 29 % |
| 1:30:00 | 90.0  | 1.13 | 0.90 | 1.25 | 1.71 | 1.65 | 1.50 | 1.36 | 0.32 | 0.90 | 1.71 | 23 % |
| 3:00:00 | 180.0 | 1.20 | 1.08 | 1.20 | 1.97 | 1.74 | 1.42 | 1.43 | 0.35 | 1.08 | 1.97 | 25 % |

#### Small intestine

| Time<br>(h) | Time<br>(min) | Subject<br>#1 | Subject<br>#2 | Subject<br>#3 | Subject<br>#4 | Subject<br>#5 | Subject<br>#6 | Mean | SD   | Min  | Max  | COV  |
|-------------|---------------|---------------|---------------|---------------|---------------|---------------|---------------|------|------|------|------|------|
| 0:01:00     | 1.0           | 1.56          | 1.03          | 0.62          | 1.46          | 1.03          | 1.73          | 1.24 | 0.41 | 0.62 | 1.73 | 33 % |
| 0:05:00     | 5.0           | 1.55          | 1.16          | 0.64          | 1.52          | 1.96          | 1.61          | 1.41 | 0.45 | 0.64 | 1.96 | 32 % |
| 0:10:00     | 10.0          | 1.57          | 1.34          | 0.81          | 1.42          | 2.15          | 1.71          | 1.50 | 0.44 | 0.81 | 2.15 | 30 % |
| 0:20:00     | 20.0          | 1.58          | 1.37          | 0.90          | 1.39          | 2.27          | 1.60          | 1.52 | 0.45 | 0.90 | 2.27 | 29 % |
| 0:30:00     | 30.0          | 1.54          | 1.05          | 0.97          | 1.32          | 2.21          | 1.49          | 1.43 | 0.45 | 0.97 | 2.21 | 31 % |
| 1:30:00     | 90.0          | 1.66          | 0.92          | 0.96          | 1.17          | 2.04          | 1.55          | 1.38 | 0.44 | 0.92 | 2.04 | 32 % |
| 3:00:00     | 180.0         | 1.39          | 1.57          | 0.89          | 1.28          | 2.05          | 1.37          | 1.42 | 0.38 | 0.89 | 2.05 | 27 % |

#### Stomach contents

| Time<br>(h) | Time<br>(min) | Subject<br>#1 | Subject<br>#2 | Subject<br>#3 | Subject<br>#4 | Subject<br>#5 | Subject<br>#6 | Mean | SD   | Min  | Max  | COV  |
|-------------|---------------|---------------|---------------|---------------|---------------|---------------|---------------|------|------|------|------|------|
| 0:01:00     | 1.0           | 1.23          | 1.09          | 0.25          | 0.26          | 1.11          | 1.28          | 0.87 | 0.48 | 0.25 | 1.28 | 56 % |
| 0:05:00     | 5.0           | 1.21          | 1.18          | 0.24          | 0.27          | 1.70          | 1.31          | 0.98 | 0.59 | 0.24 | 1.70 | 60 % |
| 0:10:00     | 10.0          | 1.14          | 1.07          | 0.25          | 0.28          | 1.43          | 1.23          | 0.90 | 0.51 | 0.25 | 1.43 | 56 % |
| 0:20:00     | 20.0          | 1.08          | 0.98          | 0.24          | 0.23          | 1.38          | 1.14          | 0.84 | 0.49 | 0.23 | 1.38 | 58 % |
| 0:30:00     | 30.0          | 1.11          | 0.92          | 0.31          | 0.23          | 1.27          | 1.25          | 0.85 | 0.47 | 0.23 | 1.27 | 55 % |
| 1:30:00     | 90.0          | 1.29          | 1.17          | 0.43          | 0.39          | 1.47          | 1.48          | 1.04 | 0.50 | 0.39 | 1.48 | 48 % |
| 3:00:00     | 180.0         | 1.19          | 0.87          | 0.83          | 0.53          | 1.62          | 1.40          | 1.07 | 0.40 | 0.53 | 1.62 | 37 % |

#### Upper large intestine (right colon)

| Time<br>(h) | Time<br>(min) | Subject<br>#1 | Subject<br>#2 | Subject<br>#3 | Subject<br>#4 | Subject<br>#5 | Subject<br>#6 | Mean | SD   | Min  | Max  | COV  |
|-------------|---------------|---------------|---------------|---------------|---------------|---------------|---------------|------|------|------|------|------|
| 0:01:00     | 1.0           | 0.56          | 0.46          | 0.49          | 0.59          | 0.52          | 0.55          | 0.53 | 0.05 | 0.46 | 0.59 | 9 %  |
| 0:05:00     | 5.0           | 0.64          | 0.57          | 0.52          | 0.75          | 0.82          | 0.66          | 0.66 | 0.11 | 0.52 | 0.82 | 17 % |
| 0:10:00     | 10.0          | 0.78          | 0.70          | 0.59          | 0.83          | 0.80          | 0.74          | 0.74 | 0.09 | 0.59 | 0.83 | 12 % |
| 0:20:00     | 20.0          | 0.82          | 0.73          | 0.57          | 0.89          | 0.82          | 0.71          | 0.76 | 0.11 | 0.57 | 0.89 | 15 % |
| 0:30:00     | 30.0          | 0.91          | 0.78          | 0.66          | 0.93          | 0.95          | 0.72          | 0.82 | 0.12 | 0.66 | 0.95 | 15 % |

|         |       |      |      |      |      |      |      |      |      |      |      |      |
|---------|-------|------|------|------|------|------|------|------|------|------|------|------|
| 1:30:00 | 90.0  | 1.15 | 1.02 | 0.59 | 1.30 | 1.10 | 0.99 | 1.03 | 0.24 | 0.59 | 1.30 | 23 % |
| 3:00:00 | 180.0 | 1.18 | 0.96 | 0.58 | 1.16 | 1.20 | 1.22 | 1.05 | 0.25 | 0.58 | 1.22 | 24 % |

### Heart contents

| Time<br>(h) | Time<br>(min) | Subject<br>#1 | Subject<br>#2 | Subject<br>#3 | Subject<br>#4 | Subject<br>#5 | Subject<br>#6 | Mean | SD   | Min  | Max   | COV  |
|-------------|---------------|---------------|---------------|---------------|---------------|---------------|---------------|------|------|------|-------|------|
| 0:01:00     | 1.0           | 9.04          | 9.47          | 9.35          | 10.65         | 7.04          | 10.84         | 9.40 | 1.37 | 7.04 | 10.84 | 15 % |
| 0:05:00     | 5.0           | 7.37          | 7.70          | 7.69          | 8.11          | 7.53          | 9.23          | 7.94 | 0.68 | 7.37 | 9.23  | 9 %  |
| 0:10:00     | 10.0          | 6.37          | 6.52          | 6.68          | 6.73          | 6.27          | 7.77          | 6.72 | 0.54 | 6.27 | 7.77  | 8 %  |
| 0:20:00     | 20.0          | 5.81          | 5.66          | 5.69          | 5.61          | 5.69          | 7.08          | 5.93 | 0.57 | 5.61 | 7.08  | 10 % |
| 0:30:00     | 30.0          | 5.01          | 5.07          | 4.88          | 5.07          | 4.82          | 6.12          | 5.16 | 0.48 | 4.82 | 6.12  | 9 %  |
| 1:30:00     | 90.0          | 3.85          | 3.45          | 3.68          | 3.80          | 3.11          | 4.16          | 3.67 | 0.36 | 3.11 | 4.16  | 10 % |
| 3:00:00     | 180.0         | 3.04          | 2.73          | 2.82          | 3.20          | 2.53          | 2.85          | 2.86 | 0.24 | 2.53 | 3.20  | 8 %  |

### Heart wall

| Time<br>(h) | Time<br>(min) | Subject<br>#1 | Subject<br>#2 | Subject<br>#3 | Subject<br>#4 | Subject<br>#5 | Subject<br>#6 | Mean | SD   | Min  | Max   | COV  |
|-------------|---------------|---------------|---------------|---------------|---------------|---------------|---------------|------|------|------|-------|------|
| 0:01:00     | 1.0           | 7.71          | 7.63          | 7.29          | 10.63         | 5.85          | 7.99          | 7.85 | 1.56 | 5.85 | 10.63 | 20 % |
| 0:05:00     | 5.0           | 6.84          | 6.46          | 6.55          | 8.56          | 6.84          | 6.93          | 7.03 | 0.77 | 6.46 | 8.56  | 11 % |
| 0:10:00     | 10.0          | 5.90          | 5.79          | 5.77          | 7.21          | 5.87          | 6.21          | 6.12 | 0.55 | 5.77 | 7.21  | 9 %  |
| 0:20:00     | 20.0          | 5.27          | 5.08          | 5.05          | 6.35          | 5.26          | 5.60          | 5.44 | 0.49 | 5.05 | 6.35  | 9 %  |
| 0:30:00     | 30.0          | 4.63          | 4.58          | 4.56          | 5.58          | 4.68          | 5.02          | 4.84 | 0.40 | 4.56 | 5.58  | 8 %  |
| 1:30:00     | 90.0          | 3.51          | 3.27          | 3.27          | 4.04          | 3.13          | 3.55          | 3.46 | 0.33 | 3.13 | 4.04  | 9 %  |
| 3:00:00     | 180.0         | 2.89          | 2.49          | 2.51          | 3.29          | 2.65          | 2.78          | 2.77 | 0.30 | 2.49 | 3.29  | 11 % |

### Kidneys

| Time<br>(h) | Time<br>(min) | Subject<br>#1 | Subject<br>#2 | Subject<br>#3 | Subject<br>#4 | Subject<br>#5 | Subject<br>#6 | Mean | SD   | Min  | Max  | COV  |
|-------------|---------------|---------------|---------------|---------------|---------------|---------------|---------------|------|------|------|------|------|
| 0:01:00     | 1.0           | 3.79          | 4.10          | 3.38          | 4.50          | 3.00          | 4.58          | 3.89 | 0.63 | 3.00 | 4.58 | 16 % |
| 0:05:00     | 5.0           | 3.51          | 4.07          | 3.18          | 4.68          | 4.21          | 4.51          | 4.03 | 0.58 | 3.18 | 4.68 | 14 % |
| 0:10:00     | 10.0          | 3.16          | 3.63          | 3.02          | 4.17          | 3.94          | 4.44          | 3.73 | 0.56 | 3.02 | 4.44 | 15 % |
| 0:20:00     | 20.0          | 2.92          | 3.37          | 2.84          | 3.64          | 3.56          | 4.24          | 3.43 | 0.51 | 2.84 | 4.24 | 15 % |
| 0:30:00     | 30.0          | 2.80          | 3.01          | 2.62          | 3.25          | 3.35          | 3.90          | 3.15 | 0.46 | 2.62 | 3.90 | 14 % |
| 1:30:00     | 90.0          | 2.48          | 2.54          | 2.44          | 2.83          | 2.69          | 3.20          | 2.70 | 0.29 | 2.44 | 3.20 | 11 % |
| 3:00:00     | 180.0         | 2.20          | 2.38          | 2.18          | 2.51          | 2.33          | 2.64          | 2.38 | 0.18 | 2.18 | 2.64 | 8 %  |

|                                 |     |     |     |     |     |     |     |    |     |     |     |
|---------------------------------|-----|-----|-----|-----|-----|-----|-----|----|-----|-----|-----|
| Organ volume (cm <sup>3</sup> ) | 326 | 289 | 320 | 297 | 375 | 318 | 321 | 30 | 289 | 375 | 9 % |
|---------------------------------|-----|-----|-----|-----|-----|-----|-----|----|-----|-----|-----|

### Liver

| Time (h)                        | Time (min) | Subject #1 | Subject #2 | Subject #3 | Subject #4 | Subject #5 | Subject #6 | Mean | SD   | Min  | Max  | COV  |
|---------------------------------|------------|------------|------------|------------|------------|------------|------------|------|------|------|------|------|
| 0:01:00                         | 1.0        | 3.59       | 3.84       | 3.46       | 4.89       | 0.47       | 4.41       | 3.45 | 1.55 | 0.47 | 4.89 | 45 % |
| 0:05:00                         | 5.0        | 3.11       | 3.29       | 3.10       | 4.38       | 4.09       | 3.79       | 3.63 | 0.54 | 3.10 | 4.38 | 15 % |
| 0:10:00                         | 10.0       | 3.00       | 3.02       | 2.88       | 3.92       | 3.71       | 3.45       | 3.33 | 0.43 | 2.88 | 3.92 | 13 % |
| 0:20:00                         | 20.0       | 2.84       | 2.80       | 2.65       | 3.40       | 3.33       | 3.12       | 3.02 | 0.31 | 2.65 | 3.40 | 10 % |
| 0:30:00                         | 30.0       | 2.71       | 2.58       | 2.42       | 3.06       | 3.04       | 2.84       | 2.78 | 0.25 | 2.42 | 3.06 | 9 %  |
| 1:30:00                         | 90.0       | 2.42       | 2.12       | 2.14       | 2.95       | 2.42       | 2.30       | 2.39 | 0.30 | 2.12 | 2.95 | 13 % |
| 3:00:00                         | 180.0      | 2.41       | 2.10       | 2.03       | 2.82       | 2.12       | 2.18       | 2.28 | 0.30 | 2.03 | 2.82 | 13 % |
| Organ volume (cm <sup>3</sup> ) |            | 1723       | 1728       | 1613       | 1715       | 1591       | 1461       | 1639 | 105  | 1461 | 1728 | 6 %  |

### Lungs

| Time (h)                        | Time (min) | Subject #1 | Subject #2 | Subject #3 | Subject #4 | Subject #5 | Subject #6 | Mean | SD   | Min  | Max  | COV  |
|---------------------------------|------------|------------|------------|------------|------------|------------|------------|------|------|------|------|------|
| 0:01:00                         | 1.0        | 1.78       | 2.28       | 1.83       | 2.53       | 1.43       | 1.73       | 1.93 | 0.40 | 1.43 | 2.53 | 21 % |
| 0:05:00                         | 5.0        | 1.48       | 1.93       | 1.57       | 2.12       | 1.68       | 1.48       | 1.71 | 0.26 | 1.48 | 2.12 | 15 % |
| 0:10:00                         | 10.0       | 1.32       | 1.74       | 1.45       | 1.84       | 1.45       | 1.32       | 1.52 | 0.22 | 1.32 | 1.84 | 14 % |
| 0:20:00                         | 20.0       | 1.23       | 1.62       | 1.33       | 1.63       | 1.41       | 1.24       | 1.41 | 0.18 | 1.23 | 1.63 | 13 % |
| 0:30:00                         | 30.0       | 1.15       | 1.52       | 1.23       | 1.49       | 1.27       | 1.13       | 1.30 | 0.17 | 1.13 | 1.52 | 13 % |
| 1:30:00                         | 90.0       | 0.91       | 1.13       | 1.02       | 1.19       | 1.03       | 0.89       | 1.03 | 0.12 | 0.89 | 1.19 | 11 % |
| 3:00:00                         | 180.0      | 0.76       | 1.12       | 0.87       | 1.01       | 0.91       | 0.77       | 0.91 | 0.14 | 0.76 | 1.12 | 15 % |
| Organ volume (cm <sup>3</sup> ) |            | 3218       | 3047       | 3877       | 2824       | 3727       | 3125       | 3303 | 411  | 2824 | 3877 | 12 % |

### Muscle

| Time (h) | Time (min) | Subject #1 | Subject #2 | Subject #3 | Subject #4 | Subject #5 | Subject #6 | Mean | SD   | Min  | Max  | COV  |
|----------|------------|------------|------------|------------|------------|------------|------------|------|------|------|------|------|
| 0:01:00  | 1.0        | 0.59       | 0.61       | 0.53       | 0.43       | 0.45       | 0.53       | 0.52 | 0.07 | 0.43 | 0.61 | 14 % |
| 0:05:00  | 5.0        | 0.62       | 0.65       | 0.56       | 0.47       | 0.58       | 0.61       | 0.58 | 0.07 | 0.47 | 0.65 | 11 % |
| 0:10:00  | 10.0       | 0.66       | 0.69       | 0.58       | 0.52       | 0.62       | 0.64       | 0.62 | 0.06 | 0.52 | 0.69 | 10 % |
| 0:20:00  | 20.0       | 0.67       | 0.71       | 0.62       | 0.53       | 0.59       | 0.64       | 0.63 | 0.06 | 0.53 | 0.71 | 10 % |
| 0:30:00  | 30.0       | 0.67       | 0.70       | 0.63       | 0.52       | 0.57       | 0.66       | 0.62 | 0.07 | 0.52 | 0.70 | 11 % |

|         |       |      |      |      |      |      |      |      |      |      |      |      |
|---------|-------|------|------|------|------|------|------|------|------|------|------|------|
| 1:30:00 | 90.0  | 0.62 | 0.64 | 0.58 | 0.47 | 0.51 | 0.61 | 0.57 | 0.07 | 0.47 | 0.64 | 11 % |
| 3:00:00 | 180.0 | 0.57 | 0.65 | 0.59 | 0.44 | 0.47 | 0.59 | 0.55 | 0.08 | 0.44 | 0.65 | 15 % |

### Pancreas

| Time<br>(h) | Time<br>(min) | Subject<br>#1 | Subject<br>#2 | Subject<br>#3 | Subject<br>#4 | Subject<br>#5 | Subject<br>#6 | Mean | SD   | Min  | Max  | COV  |
|-------------|---------------|---------------|---------------|---------------|---------------|---------------|---------------|------|------|------|------|------|
| 0:01:00     | 1.0           | 2.84          | 2.09          | ND            | ND            | ND            | 1.75          | 2.23 | 0.56 | 1.75 | 2.84 | 25 % |
| 0:05:00     | 5.0           | 3.06          | 1.76          | ND            | ND            | ND            | 1.59          | 2.14 | 0.80 | 1.59 | 3.06 | 38 % |
| 0:10:00     | 10.0          | 2.67          | 1.68          | ND            | ND            | ND            | 1.70          | 2.01 | 0.57 | 1.68 | 2.67 | 28 % |
| 0:20:00     | 20.0          | 2.72          | 1.49          | ND            | ND            | ND            | 1.57          | 1.92 | 0.69 | 1.49 | 2.72 | 36 % |
| 0:30:00     | 30.0          | 2.95          | 1.41          | ND            | ND            | ND            | 1.71          | 2.02 | 0.82 | 1.41 | 2.95 | 41 % |
| 1:30:00     | 90.0          | 2.12          | 0.85          | ND            | ND            | ND            | 1.32          | 1.43 | 0.64 | 0.85 | 2.12 | 45 % |
| 3:00:00     | 180.0         | 1.90          | 0.93          | ND            | ND            | ND            | 1.08          | 1.30 | 0.52 | 0.93 | 1.90 | 40 % |

### Red marrow

| Time<br>(h) | Time<br>(min) | Subject<br>#1 | Subject<br>#2 | Subject<br>#3 | Subject<br>#4 | Subject<br>#5 | Subject<br>#6 | Mean | SD   | Min  | Max  | COV  |
|-------------|---------------|---------------|---------------|---------------|---------------|---------------|---------------|------|------|------|------|------|
| 0:01:00     | 1.0           | 1.82          | 1.97          | 2.21          | 1.61          | 1.41          | 1.85          | 1.81 | 0.28 | 1.41 | 2.21 | 15 % |
| 0:05:00     | 5.0           | 1.91          | 2.10          | 2.29          | 1.87          | 1.88          | 2.07          | 2.02 | 0.17 | 1.87 | 2.29 | 8 %  |
| 0:10:00     | 10.0          | 1.86          | 2.09          | 2.21          | 1.67          | 1.86          | 2.04          | 1.95 | 0.19 | 1.67 | 2.21 | 10 % |
| 0:20:00     | 20.0          | 1.85          | 1.97          | 2.08          | 1.72          | 1.71          | 1.91          | 1.87 | 0.15 | 1.71 | 2.08 | 8 %  |
| 0:30:00     | 30.0          | 1.86          | 1.86          | 1.92          | 1.72          | 1.60          | 1.85          | 1.80 | 0.12 | 1.60 | 1.92 | 6 %  |
| 1:30:00     | 90.0          | 1.83          | 1.87          | 1.88          | 2.17          | 1.62          | 1.41          | 1.80 | 0.26 | 1.41 | 2.17 | 14 % |
| 3:00:00     | 180.0         | 1.70          | 1.93          | 1.74          | 2.33          | 1.61          | 1.68          | 1.83 | 0.27 | 1.61 | 2.33 | 15 % |

### Cortical bone

| Time<br>(h) | Time<br>(min) | Subject<br>#1 | Subject<br>#2 | Subject<br>#3 | Subject<br>#4 | Subject<br>#5 | Subject<br>#6 | Mean | SD   | Min  | Max  | COV  |
|-------------|---------------|---------------|---------------|---------------|---------------|---------------|---------------|------|------|------|------|------|
| 0:01:00     | 1.0           | 0.41          | 0.52          | 0.38          | 0.44          | 0.29          | 0.55          | 0.43 | 0.09 | 0.29 | 0.55 | 22 % |
| 0:05:00     | 5.0           | 0.47          | 0.59          | 0.46          | 0.51          | 0.41          | 0.67          | 0.52 | 0.09 | 0.41 | 0.67 | 18 % |
| 0:10:00     | 10.0          | 0.54          | 0.65          | 0.51          | 0.60          | 0.46          | 0.72          | 0.58 | 0.09 | 0.46 | 0.72 | 16 % |
| 0:20:00     | 20.0          | 0.57          | 0.68          | 0.56          | 0.60          | 0.50          | 0.75          | 0.61 | 0.09 | 0.50 | 0.75 | 15 % |
| 0:30:00     | 30.0          | 0.59          | 0.72          | 0.64          | 0.63          | 0.53          | 0.79          | 0.65 | 0.09 | 0.53 | 0.79 | 14 % |
| 1:30:00     | 90.0          | 0.62          | 0.78          | 0.62          | 0.72          | 0.57          | 0.86          | 0.70 | 0.11 | 0.57 | 0.86 | 16 % |
| 3:00:00     | 180.0         | 0.59          | 0.73          | 0.62          | 0.79          | 0.54          | 0.83          | 0.68 | 0.11 | 0.54 | 0.83 | 17 % |

**Trabecular bone**

| Time<br>(h) | Time<br>(min) | Subject<br>#1 | Subject<br>#2 | Subject<br>#3 | Subject<br>#4 | Subject<br>#5 | Subject<br>#6 | Mean | SD   | Min  | Max  | COV  |
|-------------|---------------|---------------|---------------|---------------|---------------|---------------|---------------|------|------|------|------|------|
| 0:01:00     | 1.0           | 0.60          | 0.59          | 0.40          | 0.65          | 0.35          | 0.80          | 0.56 | 0.17 | 0.35 | 0.80 | 30 % |
| 0:05:00     | 5.0           | 0.66          | 0.72          | 0.50          | 0.76          | 0.50          | 0.98          | 0.69 | 0.18 | 0.50 | 0.98 | 26 % |
| 0:10:00     | 10.0          | 0.68          | 0.75          | 0.51          | 0.77          | 0.52          | 1.02          | 0.71 | 0.19 | 0.51 | 1.02 | 27 % |
| 0:20:00     | 20.0          | 0.65          | 0.73          | 0.55          | 0.71          | 0.56          | 1.05          | 0.71 | 0.18 | 0.55 | 1.05 | 25 % |
| 0:30:00     | 30.0          | 0.64          | 0.74          | 0.59          | 0.74          | 0.54          | 0.96          | 0.70 | 0.15 | 0.54 | 0.96 | 21 % |
| 1:30:00     | 90.0          | 0.68          | 0.76          | 0.60          | 0.84          | 0.55          | 0.91          | 0.72 | 0.14 | 0.55 | 0.91 | 20 % |
| 3:00:00     | 180.0         | 0.63          | 0.71          | 0.59          | 0.95          | 0.53          | 0.82          | 0.70 | 0.16 | 0.53 | 0.95 | 22 % |

**Spleen**

| Time<br>(h)                     | Time<br>(min) | Subject<br>#1 | Subject<br>#2 | Subject<br>#3 | Subject<br>#4 | Subject<br>#5 | Subject<br>#6 | Mean | SD   | Min  | Max  | COV  |
|---------------------------------|---------------|---------------|---------------|---------------|---------------|---------------|---------------|------|------|------|------|------|
| 0:01:00                         | 1.0           | 3.72          | 3.78          | 4.08          | 4.56          | 3.65          | 4.23          | 4.00 | 0.35 | 3.65 | 4.56 | 9 %  |
| 0:05:00                         | 5.0           | 3.30          | 3.26          | 3.66          | 3.80          | 4.20          | 3.55          | 3.63 | 0.35 | 3.26 | 4.20 | 10 % |
| 0:10:00                         | 10.0          | 2.90          | 2.92          | 3.29          | 3.20          | 3.57          | 3.26          | 3.19 | 0.25 | 2.90 | 3.57 | 8 %  |
| 0:20:00                         | 20.0          | 2.61          | 2.68          | 2.95          | 2.87          | 3.25          | 2.87          | 2.87 | 0.23 | 2.61 | 3.25 | 8 %  |
| 0:30:00                         | 30.0          | 2.32          | 2.41          | 2.64          | 2.52          | 2.93          | 2.63          | 2.58 | 0.21 | 2.32 | 2.93 | 8 %  |
| 1:30:00                         | 90.0          | 2.01          | 2.00          | 2.43          | 2.31          | 2.24          | 1.99          | 2.16 | 0.19 | 1.99 | 2.43 | 9 %  |
| 3:00:00                         | 180.0         | 1.73          | 1.95          | 1.96          | 1.97          | 1.94          | 1.79          | 1.89 | 0.10 | 1.73 | 1.97 | 5 %  |
| Organ volume (cm <sup>3</sup> ) |               | 126           | 189           | 141           | 224           | 200           | 126           | 168  | 42   | 126  | 224  | 25 % |

**Testes**

| Time<br>(h) | Time<br>(min) | Subject<br>#1 | Subject<br>#2 | Subject<br>#3 | Subject<br>#4 | Subject<br>#5 | Subject<br>#6 | Mean | SD   | Min  | Max  | COV  |
|-------------|---------------|---------------|---------------|---------------|---------------|---------------|---------------|------|------|------|------|------|
| 0:01:00     | 1.0           | 1.05          | 0.91          | 0.46          | 0.63          | 0.63          | 0.63          | 0.72 | 0.22 | 0.46 | 1.05 | 30 % |
| 0:05:00     | 5.0           | 1.24          | 1.05          | 0.70          | 0.98          | 0.97          | 0.75          | 0.95 | 0.20 | 0.70 | 1.24 | 21 % |
| 0:10:00     | 10.0          | 1.28          | 1.22          | 0.83          | 1.26          | 1.14          | 1.13          | 1.15 | 0.16 | 0.83 | 1.28 | 14 % |
| 0:20:00     | 20.0          | 1.44          | 1.52          | 1.05          | 1.57          | 1.37          | 1.37          | 1.39 | 0.18 | 1.05 | 1.57 | 13 % |
| 0:30:00     | 30.0          | 1.53          | 1.70          | 1.29          | 2.05          | 1.56          | 1.70          | 1.64 | 0.25 | 1.29 | 2.05 | 15 % |
| 1:30:00     | 90.0          | 2.00          | 2.07          | 1.60          | 2.32          | 1.99          | 2.10          | 2.01 | 0.23 | 1.60 | 2.32 | 12 % |
| 3:00:00     | 180.0         | 1.80          | 2.46          | 1.75          | 2.22          | 1.79          | 2.18          | 2.03 | 0.29 | 1.75 | 2.46 | 14 % |

### Thyroid

| Time<br>(h)                     | Time<br>(min) | Subject<br>#1 | Subject<br>#2 | Subject<br>#3 | Subject<br>#4 | Subject<br>#5 | Subject<br>#6 | Mean | SD   | Min  | Max  | COV  |
|---------------------------------|---------------|---------------|---------------|---------------|---------------|---------------|---------------|------|------|------|------|------|
| 0:01:00                         | 1.0           | 2.33          | 3.29          | 2.31          | 3.84          | 1.95          | 2.77          | 2.75 | 0.71 | 1.95 | 3.84 | 26 % |
| 0:05:00                         | 5.0           | 2.09          | 2.91          | 2.25          | 3.71          | 2.13          | 2.84          | 2.65 | 0.63 | 2.09 | 3.71 | 24 % |
| 0:10:00                         | 10.0          | 2.23          | 2.89          | 2.10          | 3.37          | 2.10          | 2.71          | 2.57 | 0.51 | 2.10 | 3.37 | 20 % |
| 0:20:00                         | 20.0          | 2.24          | 2.77          | 2.03          | 2.82          | 2.05          | 2.55          | 2.41 | 0.35 | 2.03 | 2.82 | 15 % |
| 0:30:00                         | 30.0          | 1.96          | 2.52          | 1.95          | 2.61          | 2.04          | 2.54          | 2.27 | 0.32 | 1.95 | 2.61 | 14 % |
| 1:30:00                         | 90.0          | 1.55          | 2.25          | 1.48          | 2.31          | 1.94          | 2.15          | 1.95 | 0.36 | 1.48 | 2.31 | 18 % |
| 3:00:00                         | 180.0         | 1.49          | 1.80          | 1.30          | 1.99          | 1.90          | 1.89          | 1.73 | 0.27 | 1.30 | 1.99 | 16 % |
| Organ volume (cm <sup>3</sup> ) |               | 12            | 11            | 20            | 11            | 11            | 13            | 13   | 4    | 11   | 20   | 27 % |

### Urinary bladder contents

| Time<br>(h) | Time<br>(min) | Subject<br>#1 | Subject<br>#2 | Subject<br>#3 | Subject<br>#4 | Subject<br>#5 | Subject<br>#6 | Mean | SD   | Min  | Max  | COV  |
|-------------|---------------|---------------|---------------|---------------|---------------|---------------|---------------|------|------|------|------|------|
| 0:01:00     | 1.0           | 0.18          | 0.29          | ND            | 0.39          | 0.06          | 0.17          | 0.22 | 0.13 | 0.06 | 0.39 | 58 % |
| 0:05:00     | 5.0           | 0.56          | 2.47          | ND            | 0.63          | 0.19          | 1.36          | 1.04 | 0.90 | 0.19 | 2.47 | 87 % |
| 0:10:00     | 10.0          | 1.20          | 5.22          | ND            | 3.42          | 1.06          | 1.92          | 2.57 | 1.76 | 1.06 | 5.22 | 68 % |
| 0:20:00     | 20.0          | 1.47          | 5.40          | ND            | 5.22          | 2.03          | 2.03          | 3.23 | 1.92 | 1.47 | 5.40 | 59 % |
| 0:30:00     | 30.0          | 1.58          | 5.00          | ND            | 6.59          | 2.81          | 2.13          | 3.62 | 2.10 | 1.58 | 6.59 | 58 % |
| 1:30:00     | 90.0          | 3.51          | 7.00          | 3.94          | 7.51          | 5.80          | 5.94          | 5.62 | 1.60 | 3.51 | 7.51 | 29 % |
| 3:00:00     | 180.0         | 2.47          | 6.50          | 2.75          | 5.37          | 4.32          | 6.99          | 4.73 | 1.89 | 2.47 | 6.99 | 40 % |

COV = coefficient of variation = SD/mean×100; ND = not determined.



### SUPPLEMENTAL TABLE 3

Plasma Concentration of Intravenously Administered  $^{68}\text{Ga}$ -Citrate in Healthy Men

|            | $C_0$<br>(SUV g/mL) | $1/C_0$<br>(L/kg)* | $C_{4h}$<br>(SUV g/mL) | $1/C_{4h}$<br>(L/kg)† |
|------------|---------------------|--------------------|------------------------|-----------------------|
| Subject #1 | 17.1                | 0.0584             | 6.4                    | 0.1559                |
| Subject #2 | 19.3                | 0.0517             | ND                     | ND                    |
| Subject #3 | 15.3                | 0.0654             | 5.0                    | 0.2010                |
| Subject #4 | 18.1                | 0.0551             | 6.3                    | 0.1600                |
| Subject #5 | 15.0                | 0.0668             | 5.3                    | 0.1882                |
| Subject #6 | 18.7                | 0.0535             | 6.0                    | 0.1660                |
| Mean       | 17.3                | 0.0585             | 5.8                    | 0.1742                |
| SD         | 1.8                 | 0.0063             | 0.6217                 | 0.0195                |
| COV (%)    | 11                  | 11                 | 11                     | 11                    |

SUV = standardized uptake value; COV = Coefficient of variation =  $\text{SD}/\text{mean} \times 100$ .

\* $1/C_0$  is related to the total plasma volume.

† $1/C_{4h}$  may be related to the extracellular volume of the body.

# SUPPLEMENTAL TABLE 4

Organ Doses and Effective Doses (mSv/MBq) After Injection of <sup>68</sup>Ga-Citrate According to

OLINDA 1.0

|                            | Mean ± SD     | COV (%)* | Range       |
|----------------------------|---------------|----------|-------------|
| Adrenals                   | 0.011 ± 0.000 | 2        | 0.011–0.011 |
| Brain                      | 0.004 ± 0.001 | 13       | 0.003–0.005 |
| Breasts                    | 0.009 ± 0.000 | 3        | 0.008–0.009 |
| Gall bladder wall          | 0.013 ± 0.001 | 6        | 0.012–0.014 |
| Lower large intestine wall | 0.013 ± 0.001 | 7        | 0.012–0.014 |
| Small intestine wall       | 0.017 ± 0.002 | 10       | 0.014–0.019 |
| Stomach wall               | 0.018 ± 0.003 | 17       | 0.014–0.021 |
| Upper large intestine wall | 0.015 ± 0.001 | 7        | 0.013–0.016 |
| Heart wall                 | 0.070 ± 0.008 | 11       | 0.061–0.080 |
| Kidneys                    | 0.035 ± 0.004 | 12       | 0.030–0.040 |
| Liver                      | 0.028 ± 0.005 | 17       | 0.024–0.036 |
| Lungs                      | 0.040 ± 0.003 | 9        | 0.034–0.044 |
| Muscle                     | 0.010 ± 0.001 | 7        | 0.009–0.011 |
| Ovaries                    | 0.010 ± 0.000 | 2        | 0.010–0.011 |
| Pancreas                   | 0.021 ± 0.012 | 60       | 0.012–0.043 |
| Red marrow                 | 0.017 ± 0.001 | 6        | 0.015–0.018 |
| Osteogenic cells           | 0.021 ± 0.001 | 5        | 0.020–0.023 |
| Skin                       | 0.007 ± 0.000 | 3        | 0.007–0.008 |
| Spleen                     | 0.026 ± 0.006 | 23       | 0.020–0.035 |
| Testes                     | 0.021 ± 0.003 | 13       | 0.018–0.025 |
| Thymus                     | 0.010 ± 0.000 | 2        | 0.010–0.011 |
| Thyroid                    | 0.016 ± 0.002 | 15       | 0.013–0.020 |
| Urinary bladder wall       | 0.033 ± 0.009 | 27       | 0.024–0.049 |
| Uterus                     | 0.011 ± 0.000 | 3        | 0.011–0.011 |
| Total body                 | 0.013 ± 0.000 | 1        | 0.013–0.013 |
| Effective dose (ICRP 60)†  | 0.020 ± 0.001 | 3.7      | 0.019–0.022 |
| Effective dose (ICRP 103)‡ | 0.019 ± 0.001 | 3.0      | 0.019–0.020 |

\* Coefficient of variation = SD/mean×100.

† ICRP Publication 60 (27)

‡ ICRP Publication 103 (20)
